## Phase 2, Double-blind, Placebo-controlled, Dose-Response Trial of Intravenous Adenosine for Perioperative Analgesia

Ashraf S. Habib, M.B.B.Ch., M.Sc., F.R.C.A.,\* Harold Minkowitz, M.D.,† Timothy Osborn, M.D.,‡ Babatunde Ogunnaike, M.D.,§ Keith Candiotti, M.D.,|| Eugene Viscusi, M.D.,# Jiezhun Gu, Ph.D.,\*\* Mary R. Creed, M.S.N.,†† Tong J. Gan, M.B., F.R.C.A.,‡‡ The Adenosine Study Group§§

**Background:** Adenosine regulates pain transmission by actions at spinal, supraspinal, and peripheral sites. A few studies have suggested that administration of adenosine might be associated with anesthetic- and analgesic-sparing effects. The primary aim of this multicenter study was to determine the dose-response profile of adenosine with respect to perioperative analgesia.

**Methods:** Women undergoing major gynecologic surgery were enrolled. Subjects were randomly assigned to receive one of four doses of adenosine (25, 50, 100, or 200  $\mu\text{g} \cdot \text{kg}^{-1} \cdot \text{min}^{-1}$ ) or matching placebo. A dose-escalation cohort approach was followed. Study drug administration was started in the operating room at the time of skin incision and discontinued at the end of surgery. The anesthetic technique was standardized. Postoperative analgesia was provided with a standardized morphine patient-controlled analgesia system. Data were collected in the hospital and after discharge daily through postoperative day 7.

**Results:** A total of 166 subjects received treatment with study drug; 125 received adenosine and 41 received placebo. Except for height, there were no differences between treatment groups with respect to demographic or baseline characteristics. Cumulative opioid use during the initial 24-h period after extubation was not significantly different between treatment groups. There were also no differences between treatment groups with respect to cumulative anesthetic use, intraoperative opioid requirements, pain scores, sedation, time to readiness for discharge from the postanesthesia care unit, time to readiness for discharge from the hospital, opioid-related symptom distress scores, patient satisfaction with pain control, and occurrence of adverse events.

**Conclusions:** There were no differences between placebo and adenosine with respect to efficacy and safety for perioperative analgesia.

OPIOIDS remain the mainstay for postoperative analgesia, especially after major surgery. However, pain is a

multifactorial phenomenon that cannot be adequately controlled with simple monotherapy with opioids alone.<sup>1</sup> Furthermore, opioid use is associated with dose-related adverse effects such as respiratory depression, nausea, vomiting, urinary retention, itching, and sedation. Opioids also reduce gastrointestinal motility, which may contribute to postoperative ileus.<sup>2,3</sup> A multimodal approach involving the use of adjunct analgesics is therefore recommended to improve the quality of analgesia, produce opioid sparing, and reduce the incidence of opioid-related adverse effects.<sup>4</sup>

Adenosine is an endogenous substance and physiologically ubiquitous in the body. It is widely distributed in the whole body and is an important modulator of neurotransmission in many physiologic functions. In addition, adenosine regulates pain transmission by actions at spinal, supraspinal, and peripheral sites, with specific effects depending on receptor subtype and receptor localization.<sup>5</sup> The central nervous system contains adenosine  $A_1$ ,  $A_{2A}$ ,  $A_{2B}$ , and  $A_3$  receptors. The  $A_1$  receptor has an important role in antinociception at both the spinal and peripheral levels. At peripheral sites,  $A_{2A}$  and  $A_3$  receptors facilitate pain transmission.<sup>6</sup> Systemic and intrathecal administration of adenosine have been found to possess antinociceptive and anesthetic-sparing effects in animal models.<sup>7-9</sup> Studies in healthy volunteers also showed that adenosine reduced ischemic, thermal, and chemically induced pain.<sup>10-12</sup> Several reports also provided evidence that adenosine alleviated neuropathic pain, hyperalgesia, and allodynia.<sup>13-15</sup> A few studies suggested that the perioperative administration of adenosine might be associated with anesthetic- and analgesic-sparing effects.<sup>13,16-20</sup> However, a number of dosing regimens were used in these studies. Furthermore, a dose response for the analgesic- and anesthetic-sparing effects of adenosine was not studied. The primary aim of this study was therefore to determine the dose-response profile of adenosine with respect to perioperative analgesia and opioid-sparing effects. A secondary objective was to determine its anesthetic-sparing effects and adverse events.

### Materials and Methods

Nineteen centers across the United States participated in this study, conducted from October 5, 2005, to July 19, 2006. After institutional review board approval at each participating center and written informed consent,

\* Associate Professor, ‡‡ Professor, Department of Anesthesiology, Duke University Medical Center. † Staff Anesthesiologist, Department of Anesthesiology, Memorial City Hospital. ‡ Staff Anesthesiologist, Department of Anesthesiology, Tomball Memorial Hospital. § Associate Professor, Department of Anesthesiology, University of Texas Southwestern Medical Center at Dallas. || Associate Professor, Department of Anesthesiology, University of Miami Jackson Memorial Hospital. # Associate Professor, Department of Anesthesiology, Thomas Jefferson University. \*\* Statistician, Duke Clinical Research Institute. †† Project Leader, Duke Clinical Research Institute. §§ See appendix.

Received from the Departments of Anesthesiology at Duke University Medical Center, Durham, North Carolina; Memorial City Hospital, Houston, Texas; Tomball Memorial Hospital, Tomball, Texas; University of Texas Southwestern Medical Center, Dallas, Texas; University of Miami Jackson Memorial Hospital, Miami, Florida; and Thomas Jefferson University, Philadelphia, Pennsylvania. This multicenter study was coordinated by the Duke Clinical Research Institute, Durham, North Carolina. Submitted for publication May 28, 2008. Accepted for publication July 28, 2008. Supported by Xsira, Morrisville, North Carolina.

Address correspondence to Dr. Habib: Duke University Medical Center, Department of Anesthesiology, Durham, North Carolina 27710. habib001@mc.duke.edu. Information on purchasing reprints may be found at [www.anesthesiology.org](http://www.anesthesiology.org) or on the masthead page at the beginning of this issue. ANESTHESIOLOGY's articles are made freely accessible to all readers, for personal use only, 6 months from the cover date of the issue.

women aged 18–70 yr, with American Society of Anesthesiologists physical status classification I–III, undergoing open hysterectomy or other major gynecologic surgery during general anesthesia, were enrolled in this phase 2, randomized, double-blind, placebo-controlled, multicenter, dose-ranging study. Patients were excluded if they had a body mass index greater than 37 kg/m<sup>2</sup>; were pregnant or lactating; had a history of asthma, gout, clinically significant cardiovascular, or renal disease; or received theophylline or dipyridamole within 48 h of surgery. Patients were also excluded if they had a history of chronic opioid use; were receiving opioids within 14 days before scheduled surgery or corticosteroids for longer than 3 months; or had a known hypersensitivity to adenosine, morphine, or hydrocodone.

Subjects were randomly assigned to receive one of four doses of adenosine (25, 50, 100, or 200  $\mu\text{g} \cdot \text{kg}^{-1} \cdot \text{min}^{-1}$ ) or matching placebo by an interactive voice response system according to a computer-generated randomization schedule. A dose-escalation cohort approach was followed. Blinded study medication (adenosine or matching normal saline placebo) was supplied in 500-ml glass bottles. Each bottle was identified by a unique number associated with active or placebo treatment. Bottle numbers were assigned by the interactive voice response system. To maintain blinding between the placebo and active arms, subjects were randomly assigned to a specified ml  $\cdot \text{kg}^{-1} \cdot \text{min}^{-1}$  infusion rate. Study drug administration was started in the operating room *via* a dedicated peripheral intravenous line at the time of skin incision and was discontinued at the end of surgery. Study drug could be discontinued if there was hemodynamic instability (increase or decrease in systolic blood pressure [SBP] by 50% or SBP <80 or >200 mmHg, heart rate [HR] <45 or >120 beats/min despite treatment), clinically significant arrhythmia, high-grade conduction defect, or persistent electrocardiographic changes consistent with an ischemic pattern. Upon return of SBP and/or HR to within 25% of baseline or return of the electrocardiogram to baseline, the study drug could be reinstituted according to dose-reduction guidelines. If unacceptable hemodynamic or electrocardiographic changes recurred, the study drug was permanently discontinued. In the last cohort (200  $\mu\text{g} \cdot \text{kg}^{-1} \cdot \text{min}^{-1}$ ), study drug was started at the corresponding 100- $\mu\text{g} \cdot \text{kg}^{-1} \cdot \text{min}^{-1}$  rate and then increased by 25- $\mu\text{g} \cdot \text{kg}^{-1} \cdot \text{min}^{-1}$  increments every 2–3 min if the dose was tolerated. Immediately before each escalation in the dose of the study drug, a 6-s rhythm strip was obtained. If an adverse cardiovascular event or significant hemodynamic changes occurred during the gradual increase in dose, the dose was reduced back to the previously tolerated dose and maintained at that level throughout the procedure.

A baseline 12-lead electrocardiogram was performed for all patients. The anesthetic technique was standard-

ized and consisted of premedication with 1–2 mg midazolam, and induction of anesthesia with 1.5–2.5 mg/kg propofol and 2  $\mu\text{g}/\text{kg}$  fentanyl. A neuromuscular blocking drug of the anesthesiologist's choice was used for intubation and muscle relaxation. Anesthesia was maintained with isoflurane in  $\geq 50\%$  nitrous oxide–oxygen mixture. Ondansetron, 4 mg, was given for antiemetic prophylaxis at induction of anesthesia. Neuromuscular blockade was reversed at the end of the procedure using neostigmine and glycopyrrolate. Administration of prophylactic nonsteroidal antiinflammatory drugs or corticosteroids was not allowed. Depth of anesthesia was monitored with a target Bispectral Index (BIS) score of 40–60 using the BIS<sup>®</sup> monitor (Aspect Medical Systems, Inc., Norwood, MA). End-tidal isoflurane concentration was continuously monitored and recorded throughout the procedure. HR and SBP were continuously monitored with the aim of maintaining these values within 25% of baseline. The preincisional baseline hemodynamic values were defined as the values recorded during a 3- to 5-min interval after intubation but before skin incision.

The anesthetic regimen was adjusted according to a predefined algorithm based on hemodynamics and BIS values, ensuring that neuromuscular blockade was adequate (1 or no twitch response on train-of-four stimulation). If SBP or HR was above 25% of baseline and BIS was 40–50, a fentanyl bolus of 1  $\mu\text{g}/\text{kg}$  was given. If BIS was 50–60, the volatile agent was increased by 0.5% increments. If BIS was greater than 60, a propofol bolus of 0.5 mg/kg was given and the volatile agent was increased by 0.5% increments. If SBP was below 25% of baseline and BIS was 50–60, a 200-ml fluid bolus of crystalloid or colloid was given. If BIS was less than 50, the volatile agent was reduced by 0.5%. If SBP remained less than 25% of baseline, 100  $\mu\text{g}$  intravenous phenylephrine was given and repeated every 2 min if needed. If HR was less than 45 beats/min, 0.2 mg intravenous glycopyrrolate was given and repeated twice if needed. Other vasoactive drugs could be used if the above strategies did not keep the hemodynamic variables within the prescribed range or, in the judgment of the investigator, these drugs were necessary to the safe conduct of anesthesia. An electrocardiogram rhythm strip was obtained at induction and was repeated to document evidence of adverse cardiovascular events necessitating intervention or interruption of study drug.

Postoperative analgesia was standardized. Upon arrival to the postanesthesia care unit (PACU), morphine patient-controlled analgesia was initiated using a bolus dose of 0.06 mg/kg with a lockout period of 6 min. The bolus dose could be increased by 0.01-mg/kg increments to maintain adequate analgesia (defined by a verbal rating scale [VRS] pain score of 4 or less). Rescue boluses of 0.04 mg/kg morphine could also be administered as needed. For pain uncontrolled by morphine, as defined

by a VRS greater than 6 for more than 30 min, 15 mg intravenous ketorolac could be administered once every 6 h. The patient-controlled analgesia system could be discontinued after 24 h if the subjects were tolerating oral fluids. Subjects were then given hydrocodone-acetaminophen or oxycodone-acetaminophen tablets every 4–6 h for pain control. For pain uncontrolled by oral hydrocodone-acetaminophen or oxycodone-acetaminophen tablets, as defined by a VRS pain score greater than 6 at 1 h after administration, 10 mg oral ketorolac or 15 mg intramuscular/intravenous ketorolac was given up to every 6 h.

Pain was assessed on an 11-point VRS (0 = no pain, 10 = worst possible pain). Pain assessments were performed at rest, followed by assessment after activity (performing incentive spirometry/pulmonary hygiene). Assessments of pain and vital signs were performed every 15 min in the PACU, then every hour for 4 h, and then every 4 h thereafter for the initial 48 h after surgery or until discharge, whichever occurred first. The modified Observer's Assessment of Alertness/Sedation scale was assessed at the same time points in the first 24 h.<sup>21</sup> An assessment of the subject's recovery using the Aldrete score was performed every 15 min while the patient was in the PACU. An Aldrete score of 9 out of 10 was used to determine time to readiness for discharge from the PACU. Twelve-lead electrocardiography was performed before discharge from the PACU. Adverse events and serious adverse events assessments were performed through day 7.

Opioid-related Symptom Distress Scale assessments were performed at 24 and 48 h. Patient satisfaction with pain control was also assessed at 24 and 48 h, using an 11-point VRS (0 = completely dissatisfied, 10 = completely satisfied). Clinical laboratory assessments (complete blood count with differential and platelet count, serum chemistry panel including liver function tests) were performed at approximately 24 h postoperatively or at discharge, whichever occurred first. If the subject was discharged before 48 h, study personnel contacted the subject *via* phone to perform necessary pain, satisfaction, and opioid-related Symptom Distress Scale assessments. After discharge, data were collected *via* diary cards completed daily through postoperative day 7 and returned to the study personnel *via* US mail. Data collected included opioid-related Symptom Distress Scale assessments daily through day 7, adverse events, serious adverse events, and concomitant medications.

### Statistical Analysis

The primary outcome variable was the consumption of morphine in the initial 24 h after surgery. The sample size estimate was based on a previous study in women undergoing hysterectomy in which the mean (SD) 24-h morphine consumption was 59 (27) mg.<sup>22</sup> To demonstrate a 40% reduction in morphine consumption, with 10 subjects in the placebo group in every dose cohort in

a dose-escalation design, we estimated that 26 patients per group would be required for an overall  $\alpha$  of 0.05 and a power of 80%. To accommodate for dropouts, we aimed to randomize at least 30 subjects to each adenosine dose cohort.

SAS software (version 8.2; SAS Institute, Cary, NC) was used for statistical analyses. Results are presented as mean (SD) or median (interquartile range) for continuous variables, and as number (percentage) for categorical variables. Continuous variables were compared across the five treatments using analysis of variance. In the presence of an overall significant treatment effect, the Dunnett test was used for intergroup comparisons. For discrete variables, the Kruskal-Wallis test was performed to test the overall treatment effect.  $P < 0.05$  was considered statistically significant.

### Results

A total of 166 subjects received treatment with study drug: 125 received adenosine and 41 received placebo. Enrollment in each escalating-dose cohort was as follows: 25  $\mu\text{g} \cdot \text{kg}^{-1} \cdot \text{min}^{-1}$ : 33 subjects received adenosine, 9 subjects received placebo; 50  $\mu\text{g} \cdot \text{kg}^{-1} \cdot \text{min}^{-1}$ : 32 subjects received adenosine, 10 subjects received placebo; 100  $\mu\text{g} \cdot \text{kg}^{-1} \cdot \text{min}^{-1}$ : 30 subjects received adenosine, 10 subjects received placebo; 200  $\mu\text{g} \cdot \text{kg}^{-1} \cdot \text{min}^{-1}$ : 30 subjects received adenosine, 12 subjects received placebo. Of those 166 subjects, 143 (86.1%) completed the study as planned. A total of 23 subjects (13.9%) did not complete the full 7-day study period: 1 withdrew consent, 3 were withdrawn because of adverse events, 15 were lost to follow-up, and 4 withdrew for other reasons: the procedure was aborted in 1 subject, and 3 subjects lost or did not return their diary. However, primary endpoint data were available for 163 patients. With the exception of height, there were no significant differences between treatment groups with respect to demographic or baseline characteristics, baseline blood pressure, or HR (table 1).

Intraoperative data are summarized in table 2. There were no significant differences between the groups in the duration of surgery, intraoperative fentanyl use, intraoperative BIS score, or intraoperative use of phenylephrine and ephedrine. Significant overall differences were found in intraoperative end-tidal isoflurane concentration, intraoperative blood pressure, and HR. Between group comparisons showed that the systolic and diastolic blood pressures were significantly lower in the 100- and 200- $\mu\text{g} \cdot \text{kg}^{-1} \cdot \text{min}^{-1}$  adenosine groups compared with the placebo, 25- $\mu\text{g} \cdot \text{kg}^{-1} \cdot \text{min}^{-1}$  adenosine, and 50- $\mu\text{g} \cdot \text{kg}^{-1} \cdot \text{min}^{-1}$  adenosine groups. On the other hand, intraoperative HR was significantly higher in the 50-, 100-, and 200- $\mu\text{g} \cdot \text{kg}^{-1} \cdot \text{min}^{-1}$  adenosine groups compared with the placebo and 25- $\mu\text{g} \cdot \text{kg}^{-1} \cdot \text{min}^{-1}$  adenosine groups.



**Table 1. Patient Demographics and Baseline Hemodynamics**

|                             | Placebo,<br>n = 41 | 25 $\mu\text{g} \cdot \text{kg}^{-1} \cdot \text{min}^{-1}$<br>Adenosine,<br>n = 33 | 50 $\mu\text{g} \cdot \text{kg}^{-1} \cdot \text{min}^{-1}$<br>Adenosine,<br>n = 32 | 100 $\mu\text{g} \cdot \text{kg}^{-1} \cdot \text{min}^{-1}$<br>Adenosine,<br>n = 30 | 200 $\mu\text{g} \cdot \text{kg}^{-1} \cdot \text{min}^{-1}$<br>Adenosine,<br>n = 30 | P Value |
|-----------------------------|--------------------|-------------------------------------------------------------------------------------|-------------------------------------------------------------------------------------|--------------------------------------------------------------------------------------|--------------------------------------------------------------------------------------|---------|
| Age, yr                     | 43 (7)             | 46 (8)                                                                              | 44 (8)                                                                              | 45 (7)                                                                               | 43 (8)                                                                               | 0.56    |
| Height, cm                  | 165 (8)            | 163 (7)                                                                             | 165 (7)                                                                             | 166 (6)                                                                              | 160 (7)                                                                              | 0.01    |
| Weight, kg                  | 78 (16)            | 74 (12)                                                                             | 74 (12)                                                                             | 76 (16)                                                                              | 74 (13)                                                                              | 0.68    |
| BMI, $\text{kg}/\text{m}^2$ | 29 (5)             | 28 (4)                                                                              | 27 (4)                                                                              | 27 (6)                                                                               | 29 (5)                                                                               | 0.30    |
| ASA                         |                    |                                                                                     |                                                                                     |                                                                                      |                                                                                      | 0.16    |
| I                           | 11 (27)            | 11 (33)                                                                             | 6 (19)                                                                              | 13 (43)                                                                              | 2 (7)                                                                                |         |
| II                          | 28 (68)            | 20 (61)                                                                             | 22 (71)                                                                             | 15 (50)                                                                              | 25 (83)                                                                              |         |
| III                         | 2 (5)              | 2 (6)                                                                               | 3 (10)                                                                              | 2 (7)                                                                                | 3 (10)                                                                               |         |
| Baseline SBP, mmHg          | 108 (16)           | 115 (20)                                                                            | 112 (14)                                                                            | 109 (15)                                                                             | 112 (12)                                                                             | 0.39    |
| Baseline DBP, mmHg          | 62 (13)            | 65 (16)                                                                             | 64 (13)                                                                             | 62 (13)                                                                              | 62 (10)                                                                              | 0.80    |
| Baseline HR, beats/min      | 76 (13)            | 77 (12)                                                                             | 79 (12)                                                                             | 75 (13)                                                                              | 82 (16)                                                                              | 0.33    |

Data are presented as mean (SD), except for American Society of Anesthesiologists (ASA) physical status classification, presented as n (%).

BMI = body mass index; DBP = diastolic blood pressure; HR = heart rate; SBP = systolic blood pressure.

Postoperative data are presented in table 3. There was no significant difference between the treatment groups in cumulative opioid use during the initial 24-h period after extubation (primary outcome measure). There were also no significant differences between treatment groups with respect to the 24–48 h morphine consumption or other secondary efficacy measures, including sedation scores; time to readiness for discharge from the PACU; time to readiness for discharge from the hospital; opioid-related symptom distress scores; patient satisfaction with pain control; use of rescue analgesics; and times to extubation, eye opening, and response to spoken command. There was also no difference between the groups in the incidence of postoperative nausea, vomiting, or pruritus. There were no differences between treatment groups in VRS pain scores at rest at 0–2 or 0–24 h. However, there was an overall difference between treatment groups in worst pain scores at rest between 24 and 48 h ( $P = 0.03$ ), with VRS scores being

significantly lower in the 25- $\mu\text{g} \cdot \text{kg}^{-1} \cdot \text{min}^{-1}$  adenosine group compared with the 200- $\mu\text{g} \cdot \text{kg}^{-1} \cdot \text{min}^{-1}$  group ( $P = 0.028$ ). For the maximum pain scores after activity, there were no significant differences between the treatment groups at any of the time points.

No differences between the groups were identified with respect to laboratory assessments, electrocardiographic changes, or postoperative vital signs (table 4). Adverse events were not different between the groups. Of note, cardiac events were reported in 2.4% of patients in the placebo group and 5.6% of the combined adenosine groups, with a 10% incidence reported in both the 100- and 200- $\mu\text{g} \cdot \text{kg}^{-1} \cdot \text{min}^{-1}$  dose cohorts of adenosine. A total of 9 serious adverse events were reported by 8 (5%) of the 166 subjects who were treated with study drug (2 in the placebo group and 6 in the adenosine group). These events included postprocedural hemorrhage, respiratory depression, coagulopathy, pyrexia, hypovolemia, abnormal liver function test results, and gas-

**Table 2. Intraoperative Data**

|                                        | Placebo,<br>n = 41 | 25 $\mu\text{g} \cdot \text{kg}^{-1} \cdot \text{min}^{-1}$<br>Adenosine,<br>n = 33 | 50 $\mu\text{g} \cdot \text{kg}^{-1} \cdot \text{min}^{-1}$<br>Adenosine,<br>n = 32 | 100 $\mu\text{g} \cdot \text{kg}^{-1} \cdot \text{min}^{-1}$<br>Adenosine,<br>n = 30 | 200 $\mu\text{g} \cdot \text{kg}^{-1} \cdot \text{min}^{-1}$<br>Adenosine,<br>n = 30 | P Value |
|----------------------------------------|--------------------|-------------------------------------------------------------------------------------|-------------------------------------------------------------------------------------|--------------------------------------------------------------------------------------|--------------------------------------------------------------------------------------|---------|
| Duration of surgery, min               | 120 (94–166)       | 101 (91–150)                                                                        | 124 (103–186)                                                                       | 146 (110–173)                                                                        | 114 (96–171)                                                                         | 0.32    |
| Intraoperative fentanyl, $\mu\text{g}$ | 142 (50)           | 144 (30)                                                                            | 134 (35)                                                                            | 144 (38)                                                                             | 140 (39)                                                                             | 0.81    |
| End-tidal isoflurane, %                | 0.8 (0.2)          | 0.8 (0.2)                                                                           | 0.7 (0.2)                                                                           | 0.7 (0.2)                                                                            | 0.8 (0.3)                                                                            | 0.04    |
| Intraoperative bradycardia             | 1 (2%)             | 0 (0%)                                                                              | 0 (0%)                                                                              | 0 (0%)                                                                               | 1 (3%)                                                                               | 0.81    |
| Phenylephrine use                      | 4 (10%)            | 6 (18%)                                                                             | 4 (13%)                                                                             | 10 (33%)                                                                             | 5 (17%)                                                                              | 0.11    |
| Phenylephrine dose, $\mu\text{g}$      | 200 (82)           | 242 (128)                                                                           | 668 (1,192)                                                                         | 515 (606)                                                                            | 560 (418)                                                                            | 0.71    |
| Ephedrine use                          | 3 (7%)             | 1 (3%)                                                                              | 3 (9%)                                                                              | 5 (17%)                                                                              | 3 (10%)                                                                              | 0.46    |
| Ephedrine dose, mg                     | 8 (3)              | 5 (NA)                                                                              | 10 (5)                                                                              | 19 (27)                                                                              | 12 (3)                                                                               | 0.88    |
| SBP, mmHg                              | 118 (14)*          | 114 (12)†                                                                           | 111 (11)‡                                                                           | 102 (12)                                                                             | 110 (11)                                                                             | <0.0001 |
| DBP, mmHg                              | 69 (11)§           | 66 (12)§                                                                            | 64 (9)¶                                                                             | 52 (10)                                                                              | 53 (9)                                                                               | <0.0001 |
| HR, beats/min                          | 72 (12)#           | 72 (11)**                                                                           | 83 (13)                                                                             | 80 (10)                                                                              | 87 (11)                                                                              | <0.0001 |
| BIS score                              | 44 (8)             | 46 (8)                                                                              | 48 (6)                                                                              | 49 (8)                                                                               | 47 (7)                                                                               | 0.10    |

Data are presented as mean (SD), median (interquartile range), or number of subjects (%).

\*  $P < 0.0001$  vs. 100 and 200 adenosine. †  $P = 0.001$  vs. 100 adenosine and  $P = 0.0005$  vs. 200 adenosine. ‡  $P = 0.03$  vs. 100 adenosine and  $P = 0.016$  vs. 200 adenosine. §  $P < 0.0001$  vs. 100 and 200 adenosine. ¶  $P = 0.0001$  vs. 100 adenosine and  $P = 0.0003$  vs. 200 adenosine. #  $P = 0.0018$  vs. 50 adenosine,  $P = 0.0369$  vs. 100 adenosine, and  $P < 0.0001$  vs. 200 adenosine. \*\*  $P = 0.0032$  vs. 50 adenosine,  $P = 0.0489$  vs. 100 adenosine, and  $P < 0.0001$  vs. 200 adenosine.

BIS = Bispectral Index; DBP = diastolic blood pressure; HR = heart rate; NA = not applicable; SBP = systolic blood pressure.

Table 3. Postoperative Data

|                                                       | Placebo,<br>n = 41 | 25 $\mu\text{g} \cdot \text{kg}^{-1} \cdot \text{min}^{-1}$<br>Adenosine,<br>n = 33 | 50 $\mu\text{g} \cdot \text{kg}^{-1} \cdot \text{min}^{-1}$<br>Adenosine,<br>n = 32 | 100 $\mu\text{g} \cdot \text{kg}^{-1} \cdot \text{min}^{-1}$<br>Adenosine,<br>n = 30 | 200 $\mu\text{g} \cdot \text{kg}^{-1} \cdot \text{min}^{-1}$<br>Adenosine,<br>n = 30 | P Value |
|-------------------------------------------------------|--------------------|-------------------------------------------------------------------------------------|-------------------------------------------------------------------------------------|--------------------------------------------------------------------------------------|--------------------------------------------------------------------------------------|---------|
| Opioid consumption, 0–24 h, mg                        | 66 (33)            | 66 (35)                                                                             | 67 (46)                                                                             | 67 (26)                                                                              | 78 (50)                                                                              | 0.70    |
| Opioid consumption, 24–48 h, mg                       | 29 (19)            | 33 (24)                                                                             | 36 (32)                                                                             | 29 (18)                                                                              | 32 (23)                                                                              | 0.78    |
| Need for rescue ketorolac                             | 25 (63%)           | 18 (56%)                                                                            | 13 (42%)                                                                            | 18 (60%)                                                                             | 18 (62%)                                                                             | 0.44    |
| Time to first dose of ketorolac after extubation, min | 1,459 (122)        | 1,761 (608)                                                                         | 1,582 (417)                                                                         | 1,464 (63)                                                                           | 1,630 (461)                                                                          | 0.08    |
| VRS worst pain at rest, 0–2 h                         | 8.1 (2.0)          | 7.6 (2.4)                                                                           | 8.4 (1.9)                                                                           | 8.2 (1.9)                                                                            | 8.1 (2.2)                                                                            | 0.69    |
| VRS maximum pain after activity, 0–2 h                | 8.2 (2.2)          | 7.9 (2.7)                                                                           | 8.8 (1.8)                                                                           | 8.4 (1.5)                                                                            | 8.5 (2.1)                                                                            | 0.57    |
| VRS worst pain at rest, 0–24 h                        | 8.2 (1.9)          | 7.7 (2.4)                                                                           | 8.4 (2.1)                                                                           | 8.2 (1.8)                                                                            | 8.3 (2.1)                                                                            | 0.68    |
| VRS maximum pain after activity, 0–24 h               | 8.4 (2.1)          | 8.0 (2.6)                                                                           | 9.1 (1.4)                                                                           | 8.7 (1.3)                                                                            | 8.8 (1.9)                                                                            | 0.20    |
| VRS worst pain at rest, 24–48 h                       | 4.5 (2.3)          | 3.1 (2.1)*                                                                          | 4.3 (3.2)                                                                           | 3.7 (2.3)                                                                            | 5.1 (2.5)                                                                            | 0.03    |
| VRS maximum pain after activity, 24–48 h              | 5.4 (2.2)          | 4.3 (2.4)                                                                           | 5.7 (2.7)                                                                           | 5.3 (2.2)                                                                            | 5.8 (2.7)                                                                            | 0.11    |
| Patient satisfaction with pain control                | 8.8 (2.1)          | 8.9 (1.7)                                                                           | 8.7 (2)                                                                             | 8.3 (2.2)                                                                            | 8.5 (1.8)                                                                            | 0.78    |
| Time to readiness for PACU discharge, min             | 30 (43)            | 30 (45)                                                                             | 39 (59)                                                                             | 29 (34)                                                                              | 49 (57)                                                                              | 0.42    |
| Time to readiness for discharge from hospital, h      | 69 (21)            | 66 (21)                                                                             | 64 (15)                                                                             | 71 (35)                                                                              | 74 (21)                                                                              | 0.58    |
| Nausea, 0–24 h                                        | 29 (73%)           | 19 (61%)                                                                            | 14 (45%)                                                                            | 18 (60%)                                                                             | 16 (55%)                                                                             | 0.22    |
| Vomiting, 0–24 h                                      | 4 (10%)            | 3 (10%)                                                                             | 3 (10%)                                                                             | 7 (23%)                                                                              | 7 (24%)                                                                              | 0.22    |
| Pruritus, 0–24 h                                      | 23 (58%)           | 16 (52%)                                                                            | 19 (61%)                                                                            | 19 (63%)                                                                             | 23 (79%)                                                                             | 0.25    |

Data are presented as mean (SD) or number (%).

\*  $P = 0.028$  vs. 200  $\mu\text{g} \cdot \text{kg}^{-1} \cdot \text{min}^{-1}$  adenosine.

PACU = postanesthesia care unit; VRS = verbal rating score.

tric cancer. None of these events were considered related to study drug.

## Discussion

In this study, we found no significant differences between adenosine and placebo with respect to the analgesic efficacy for postoperative pain management. While this study was powered on the primary endpoint of 24-h opioid consumption, a *post hoc* sensitivity analysis was conducted using the observed mean 24-h worst VRS pain score at rest in the placebo group, and its SD pooled from all groups. This analysis found that a study with our sample size would have 95% power at an overall  $\alpha$  of 0.05 to detect a reduction in VRS of 20% between placebo

and the group with the lowest VRS, assuming a constant dose effect across treatments. Therefore, this study was adequately powered for both its primary endpoint and its main secondary endpoint.

Previous studies investigating the analgesic- and anesthetic-sparing effects of the perioperative administration of adenosine have yielded conflicting results. For example, three studies by one group of investigators evaluated the use of intravenous adenosine during breast surgery,<sup>16</sup> shoulder surgery,<sup>18</sup> and abdominal hysterectomy.<sup>17</sup> In each study, patients received an intravenous infusion of 80  $\mu\text{g} \cdot \text{kg}^{-1} \cdot \text{min}^{-1}$  adenosine or placebo during surgery. In the study involving hysterectomy, patients also received a reduced dose of intravenous adenosine (40  $\mu\text{g} \cdot \text{kg}^{-1} \cdot \text{min}^{-1}$ ) for 3 h after surgery. Postoperative analgesic requirements

Table 4. Cardiovascular Side Effects

|                                | Placebo,<br>n = 41 | 25 $\mu\text{g} \cdot \text{kg}^{-1} \cdot \text{min}^{-1}$<br>Adenosine,<br>n = 33 | 50 $\mu\text{g} \cdot \text{kg}^{-1} \cdot \text{min}^{-1}$<br>Adenosine,<br>n = 32 | 100 $\mu\text{g} \cdot \text{kg}^{-1} \cdot \text{min}^{-1}$<br>Adenosine,<br>n = 30 | 200 $\mu\text{g} \cdot \text{kg}^{-1} \cdot \text{min}^{-1}$<br>Adenosine,<br>n = 30 |
|--------------------------------|--------------------|-------------------------------------------------------------------------------------|-------------------------------------------------------------------------------------|--------------------------------------------------------------------------------------|--------------------------------------------------------------------------------------|
| First-degree AV block          | 0 (0)              | 0 (0)                                                                               | 0 (0)                                                                               | 1 (3)                                                                                | 1 (3)                                                                                |
| Second-degree AV block         | 0 (0)              | 0 (0)                                                                               | 0 (0)                                                                               | 0 (0)                                                                                | 1 (3)                                                                                |
| Bradycardia, HR <45 beats/min  | 1 (2)              | 0 (0)                                                                               | 0 (0)                                                                               | 1 (3)                                                                                | 1 (3)                                                                                |
| Myocardial ischemia            | 0 (0)              | 0 (0)                                                                               | 0 (0)                                                                               | 1 (3)                                                                                | 0 (0)                                                                                |
| Tachycardia, HR >120 beats/min | 0 (0)              | 1 (3)                                                                               | 0 (0)                                                                               | 0 (0)                                                                                | 1 (3)                                                                                |
| ECG ST-segment depression      | 0 (0)              | 0 (0)                                                                               | 0 (0)                                                                               | 0 (0)                                                                                | 2 (5)                                                                                |
| ECG T-wave abnormality         | 0 (0)              | 0 (0)                                                                               | 1 (4)                                                                               | 2 (8)                                                                                | 0 (0)                                                                                |

Data are presented as number (%).

AV = atrioventricular; ECG = electrocardiogram; HR = heart rate.

were reduced with adenosine in two studies.<sup>16,17</sup> Furthermore, there was an anesthetic-sparing effect, most pronounced in the hysterectomy study, where a 36% isoflurane-sparing effect was reported.<sup>17</sup> However, there was no reduction in opioid-related side effects in these studies. The authors also did not report improved recovery or a shortened duration of PACU or hospital stay as a result of opioid sparing. Some limitations of the methodology used in these studies have been highlighted, including the lack of description of well-defined variables to titrate anesthesia, inconsistent reporting of the doses of intraoperative opioids, no continuous monitoring of end-tidal isoflurane concentration, inconsistent description of the mode of delivery of postoperative opioids, and their intravenous or intramuscular administration on a *pro re nata* basis.<sup>23</sup>

Adenosine was also better than intravenous remifentanyl in providing pain relief and reducing the need for opioid analgesia after hysterectomy and major orthopedic surgery performed during general anesthesia.<sup>19,20</sup> The dose of adenosine infusion used was variable, ranging from 50 to 500  $\mu\text{g} \cdot \text{kg}^{-1} \cdot \text{min}^{-1}$  and from 72 to 290  $\mu\text{g} \cdot \text{kg}^{-1} \cdot \text{min}^{-1}$  in these two studies.<sup>19,20</sup> Postoperative pain scores were also significantly lower during the postoperative period in patients who received adenosine, with pronounced and sustained relief lasting up to 48 h. The improved analgesia with adenosine in comparison with remifentanyl could however be a result of the development of acute opioid tolerance or hyperalgesia after the use of remifentanyl. This phenomenon has been reported in a number of studies, where a significant increase in pain scores and opioid consumption in the postoperative period followed the intraoperative use of remifentanyl.<sup>24,25</sup>

Other studies did not report a useful analgesic effect of adenosine or adenosine receptor agonists in the postoperative period. In a multicenter study, the administration of a selective A<sub>1</sub> receptor agonist did not improve pain relief compared with placebo, in patients undergoing third molar extraction during general anesthesia.<sup>26</sup> Similarly, the intrathecal administration of 500–1,000  $\mu\text{g}$  adenosine did not provide any anesthetic- or analgesic-sparing effects in women undergoing abdominal hysterectomy during general anesthesia.<sup>27,28</sup>

The lack of analgesic effect of adenosine in our study could have a number of explanations. First, this could be related to the timing of starting the administration of adenosine. Whereas the infusion of adenosine was started 5–15 min before skin incision in previous studies,<sup>13,16–20</sup> we started the administration of adenosine at the time of skin incision. This was done to avoid any untoward hemodynamic changes after induction of anesthesia before the start of surgical stimulation. It is possible that the preemptive administration of adenosine is important for its analgesic effect. However, although the evidence for preemptive analgesia in animal studies is convincing,<sup>29</sup> results from human studies re-

main equivocal and agent dependent.<sup>30</sup> Second, the dose of adenosine used could have been insufficient to achieve an analgesic effect. This is unlikely, however, because studies that investigated a constant infusion regimen used a dose of 80  $\mu\text{g} \cdot \text{kg}^{-1} \cdot \text{min}^{-1}$ ,<sup>13,16–18</sup> which lies within the range of doses that we used in our study. These doses were selected for evaluation in this study based on the range of doses that were found to be efficacious and safe, and we also included doses above and below what was published in perioperative trials comparing adenosine with placebo. In the two studies comparing adenosine with remifentanyl, a variable infusion regimen was used. In one study,<sup>19</sup> the mean (SD) dose of 292 (82)  $\mu\text{g} \cdot \text{kg}^{-1} \cdot \text{min}^{-1}$  is higher than the dose that we used, while in the other study,<sup>20</sup> the mean (SD) dose of 166 (17)  $\mu\text{g} \cdot \text{kg}^{-1} \cdot \text{min}^{-1}$  is lower than the dose than we used in cohort 4. However, because we had a 10% incidence of cardiovascular side effects in the 100- and 200- $\mu\text{g} \cdot \text{kg}^{-1} \cdot \text{min}^{-1}$  cohorts, it is likely that higher doses of adenosine might be associated with even a higher incidence of cardiovascular side effects and therefore would not be well tolerated in the perioperative period. Third, because the main site of action of adenosine is likely to be spinal, it is possible that intravenous administration does not deliver the drug in sufficient concentrations. For example, in patients with neuropathic pain, intrathecal administration of 2 mg adenosine was effective in reducing allodynia and hyperalgesia, whereas intravenous administration of the same dose was not effective.<sup>31</sup> However, two studies investigating the intrathecal administration of adenosine in the perioperative period did not show any useful anesthetic- or analgesic-sparing effects.<sup>27,28</sup> In this study, we only included women undergoing gynecologic abdominal surgery. This provided a homogeneous patient population but did not allow us to examine whether the results would have been different if we had also included men. Although it has been suggested that sex may affect response to some analgesics, such as opioids,<sup>32</sup> there are no data to suggest that this might be the case with adenosine. Finally, it is possible that despite its potential analgesic efficacy in other pain states, such as neuropathic pain,<sup>15,31</sup> adenosine does not possess a useful analgesic effect in the perioperative period, and the positive findings in some of the previous investigations were due to limitations in the methodology or secondary to the hyperalgesia after remifentanyl administration, as previously highlighted.

In summary, the use of intraoperative adenosine infusion did not provide a useful analgesic effect in women undergoing major gynecologic surgery during general anesthesia. Because this study was adequately powered for both its primary and main secondary endpoints, we believe that further investigation of intravenous adenosine for perioperative analgesia is unwarranted.

## References

- Siddall PJ, Cousins MJ: Pain mechanisms and management: An update. *Clin Exp Pharmacol Physiol* 1995; 22:679-88
- Cali RL, Meade PG, Swanson MS, Freeman C: Effect of morphine and incision length on bowel function after colectomy. *Dis Colon Rectum* 2000; 43:163-8
- Thorn SE, Wattwil M, Naslund I: Postoperative epidural morphine, but not epidural bupivacaine, delays gastric emptying on the first day after cholecystectomy. *Reg Anesth* 1992; 17:91-4
- Kehlet H: Multimodal approach to control postoperative pathophysiology and rehabilitation. *Br J Anaesth* 1997; 78:606-17
- Sawynok J, Liu XJ: Adenosine in the spinal cord and periphery: Release and regulation of pain. *Prog Neurobiol* 2003; 69:313-40
- Sawynok J: Adenosine receptor activation and nociception. *Eur J Pharmacol* 1998; 347:1-11
- Holmgren M, Hednar T, Nordberg G, Mellstrand T: Antinociceptive effects in the rat of an adenosine analogue, N6-phenylisopropyladenosine. *J Pharm Pharmacol* 1983; 35:679-80
- Birch BD, Louie GL, Vickery RG, Gaba DM, Maze M: L-phenylisopropyladenosine (L-PIA) diminishes halothane anesthetic requirements and decreases noradrenergic neurotransmission in rats. *Life Sci* 1988; 42:1355-60
- Seitz PA, ter Riet M, Rush W, Merrell WJ: Adenosine decreases the minimum alveolar concentration of halothane in dogs. *ANESTHESIOLOGY* 1990; 73:990-4
- Rane K, Segerdahl M, Goiny M, Sollevi A: Intrathecal adenosine administration: A phase I clinical safety study in healthy volunteers, with additional evaluation of its influence on sensory thresholds and experimental pain. *ANESTHESIOLOGY* 1998; 89:1108-15
- Eisenach JC, Curry R, Hood DD: Dose response of intrathecal adenosine in experimental pain and allodynia. *ANESTHESIOLOGY* 2002; 97:938-42
- Segerdahl M, Ekblom A, Sollevi A: The influence of adenosine, ketamine, and morphine on experimentally induced ischemic pain in healthy volunteers. *Anesth Analg* 1994; 79:787-91
- Belfrage M, Sollevi A, Segerdahl M, Sjolund KF, Hansson P: Systemic adenosine infusion alleviates spontaneous and stimulus evoked pain in patients with peripheral neuropathic pain. *Anesth Analg* 1995; 81:713-7
- Sollevi A, Belfrage M, Lundberg T, Segerdahl M, Hansson P: Systemic adenosine infusion: A new treatment modality to alleviate neuropathic pain. *Pain* 1995; 61:155-8
- Lynch ME, Clark AJ, Sawynok J: Intravenous adenosine alleviates neuropathic pain: A double blind placebo controlled crossover trial using an enriched enrolment design. *Pain* 2003; 103:111-7
- Segerdahl M, Ekblom A, Sandelin K, Wickman M, Sollevi A: Perioperative adenosine infusion reduces the requirements for isoflurane and postoperative analgesics. *Anesth Analg* 1995; 80:1145-9
- Segerdahl M, Irestedt L, Sollevi A: Antinociceptive effect of perioperative adenosine infusion in abdominal hysterectomy. *Acta Anaesthesiol Scand* 1997; 41:473-9
- Segerdahl M, Persson E, Ekblom A, Sollevi A: Perioperative adenosine infusion reduces isoflurane concentrations during general anesthesia for shoulder surgery. *Acta Anaesthesiol Scand* 1996; 40:792-7
- Fukunaga AF, Alexander GE, Stark CW: Characterization of the analgesic actions of adenosine: Comparison of adenosine and remifentanyl infusions in patients undergoing major surgical procedures. *Pain* 2003; 101:129-38
- Zarate E, Sa Rego MM, White PF, Duffy L, Shearer VE, Griffin JD, Whitten CW: Comparison of adenosine and remifentanyl infusions as adjuvants to desflurane anesthesia. *ANESTHESIOLOGY* 1999; 90:956-63
- Chernik DA, Gillings D, Laine H, Hendler J, Silver JM, Davidson AB, Schwam EM, Siegel JL: Validity and reliability of the Observer's Assessment of Alertness/Sedation Scale: Study with intravenous midazolam. *J Clin Psychopharmacol* 1990; 10:244-51
- Gan TJ, Ginsberg B, Glass PS, Fortney J, Jhaveri R, Perno R: Opioid-sparing effects of a low-dose infusion of naloxone in patient-administered morphine sulfate. *ANESTHESIOLOGY* 1997; 87:1075-81
- Gan TJ, Habib AS: Adenosine as a non-opioid analgesic in the perioperative setting. *Anesth Analg* 2007; 105:487-94
- Crawford MW, Hickey C, Zaarour C, Howard A, Naser B: Development of acute opioid tolerance during infusion of remifentanyl for pediatric scoliosis surgery. *Anesth Analg* 2006; 102:1662-7
- Guignard B, Bossard AE, Coste C, Sessler DI, Lebrault C, Alfonsi P, Fletcher D, Chauvin M: Acute opioid tolerance: Intraoperative remifentanyl increases postoperative pain and morphine requirement. *ANESTHESIOLOGY* 2000; 93:409-17
- Sneyd JR, Langton JA, Allan LG, Peacock JE, Rowbotham DJ: Multicentre evaluation of the adenosine agonist GR79236X in patients with dental pain after third molar extraction. *Br J Anaesth* 2007; 98:672-6
- Rane K, Sollevi A, Segerdahl M: Intrathecal adenosine administration in abdominal hysterectomy lacks analgesic effect. *Acta Anaesthesiol Scand* 2000; 44:868-72
- Sharma M, Mohta M, Chawla R: Efficacy of intrathecal adenosine for postoperative pain relief. *Eur J Anaesthesiol* 2006; 23:449-53
- Wall PD: The prevention of postoperative pain. *Pain* 1988; 33:289-90
- Ong CK, Lirk P, Seymour RA, Jenkins BJ: The efficacy of preemptive analgesia for acute postoperative pain management: A meta-analysis. *Anesth Analg* 2005; 100:757-73
- Eisenach JC, Rauck RL, Curry R: Intrathecal, but not intravenous adenosine reduces allodynia in patients with neuropathic pain. *Pain* 2003; 105:65-70
- Dahan A, Kest B, Waxman AR, Sarton E: Sex-specific responses to opiates: Animal and human studies. *Anesth Analg* 2008; 107:83-95

## Appendix: The Adenosine Study Group

David Adams, M.D., University of Vermont, Burlington, Vermont; Kumar Belani, M.D., University of Minnesota, Minneapolis, Minnesota; Keith Candiotti, M.D., University of Miami Jackson Memorial Hospital, Miami, Florida; Ashraf Habib, M.D., Duke University Medical Center, Durham, North Carolina; Irwin Gratz, M.D., Cooper Hospital University Medical Center, Camden, New Jersey; Michael O'Connor, M.D., University of Chicago, Chicago, Illinois; Rishimani Adsumelli, M.D., Stony Brook University Hospital, Stony Brook, New York; Eugene Viscusi, M.D., Thomas Jefferson University, Philadelphia, Pennsylvania; Babatunde Ogunnaike, M.D., University of Texas Southwestern Medical Center at Dallas, Dallas, Texas; Ashish Sinha, M.D., University of Pennsylvania, Philadelphia, Pennsylvania; James B. Mayfield, M.D., Medical College of Georgia, Augusta, Georgia; Harold Minkowitz, M.D., Memorial Hermann Healthcare System, Memorial City Hospital, Houston, Texas; Timothy C. Osborn, M.D., Tomball Memorial Hospital, Tomball, Texas; Spencer Yost, M.D., University of California, San Francisco, California; R. Kevin Jones, M.D., Accurate Clinical Trials Inc., San Clemente, California; Howard Miller, M.D., The Woman's Hospital of Texas, Houston, Texas.
